# Supplementary material for: Regulation of Eye Determination and Regionalization in the Spider Parasteatoda tepidariorum
Source: MDPI journal article supplement (doi:10.3390/cells11040631), 2022-02-11
Supplement: s1 [file s1]

## Supplementary Materials:

### Regulation of Eye Determination and Regionalization in the Spider *Parasteatoda tepidariorum*

Luis Baudouin-Gonzalez <sup>1,\*</sup>, Amber Harper <sup>2</sup>, Alistair P. McGregor <sup>2,3</sup> and Lauren Sumner-Rooney <sup>4</sup>

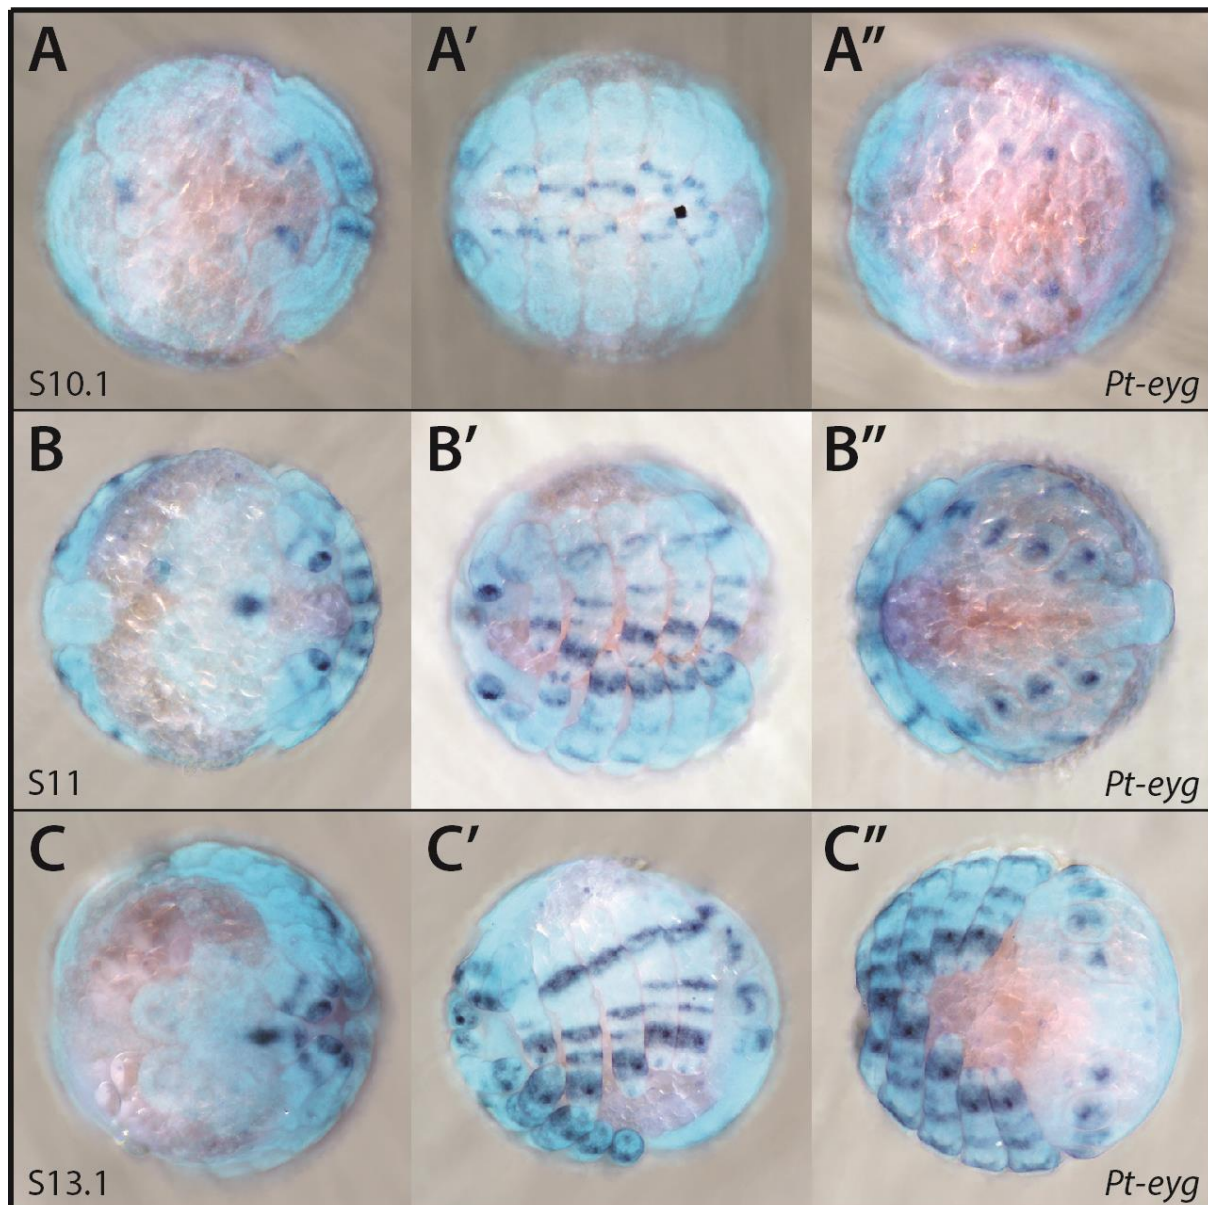

**Figure S1.** Expression of *eyegone* in *Parasteatoda tepidariorum* embryos. Colorimetric ISH showing *Pt-eyg* expression in stage 10.1 (A-A''), 11 (B-B'') and 13.1 (C-C''). No expression was detected in or around the developing eye primordia.

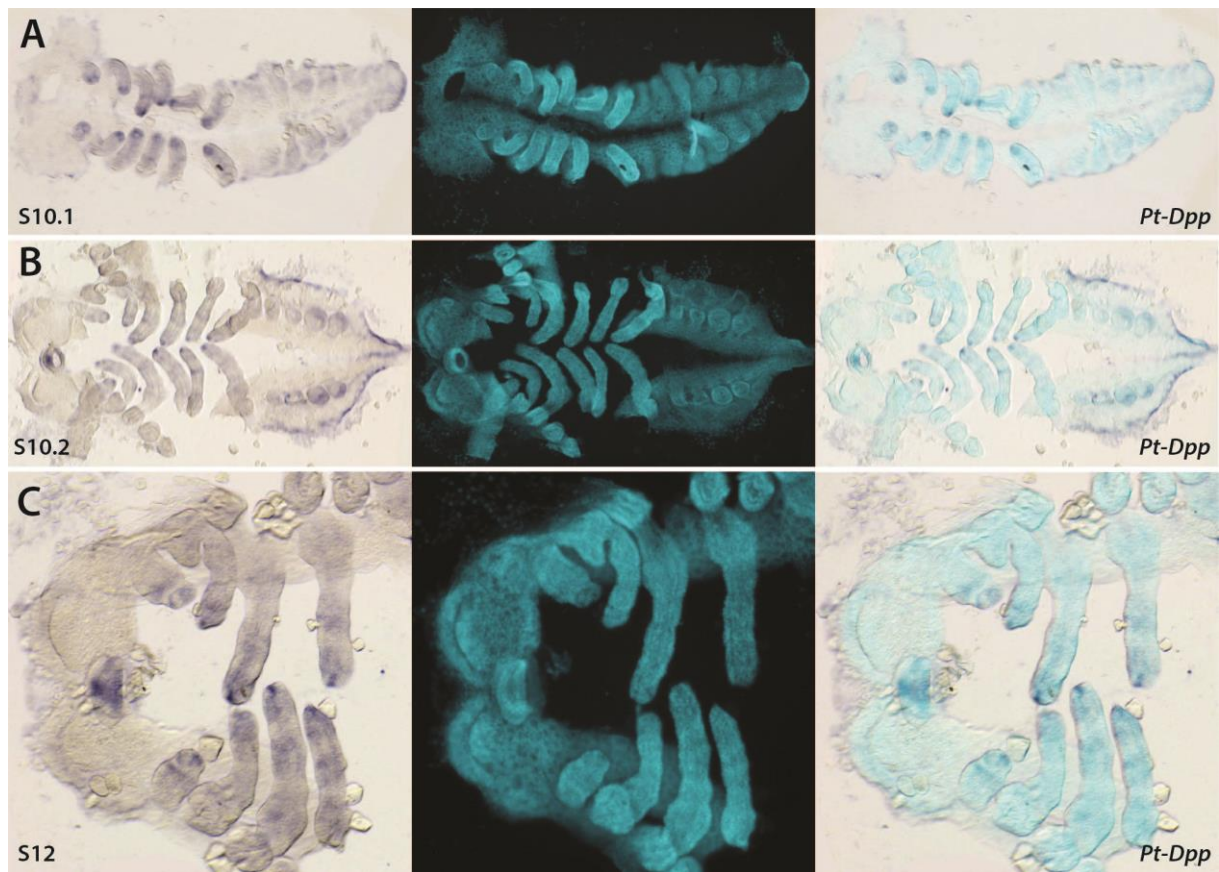

**Figure S2.** Expression of *dpp* in *Parasteatoda tepidariorum* embryos. Colorimetric ISH showing *Pt-dpp* expression in stage 10.1 (A-A''), 10.2 (B-B'') and 12 (C-C''). No expression was detected in or around the developing eye primordia.

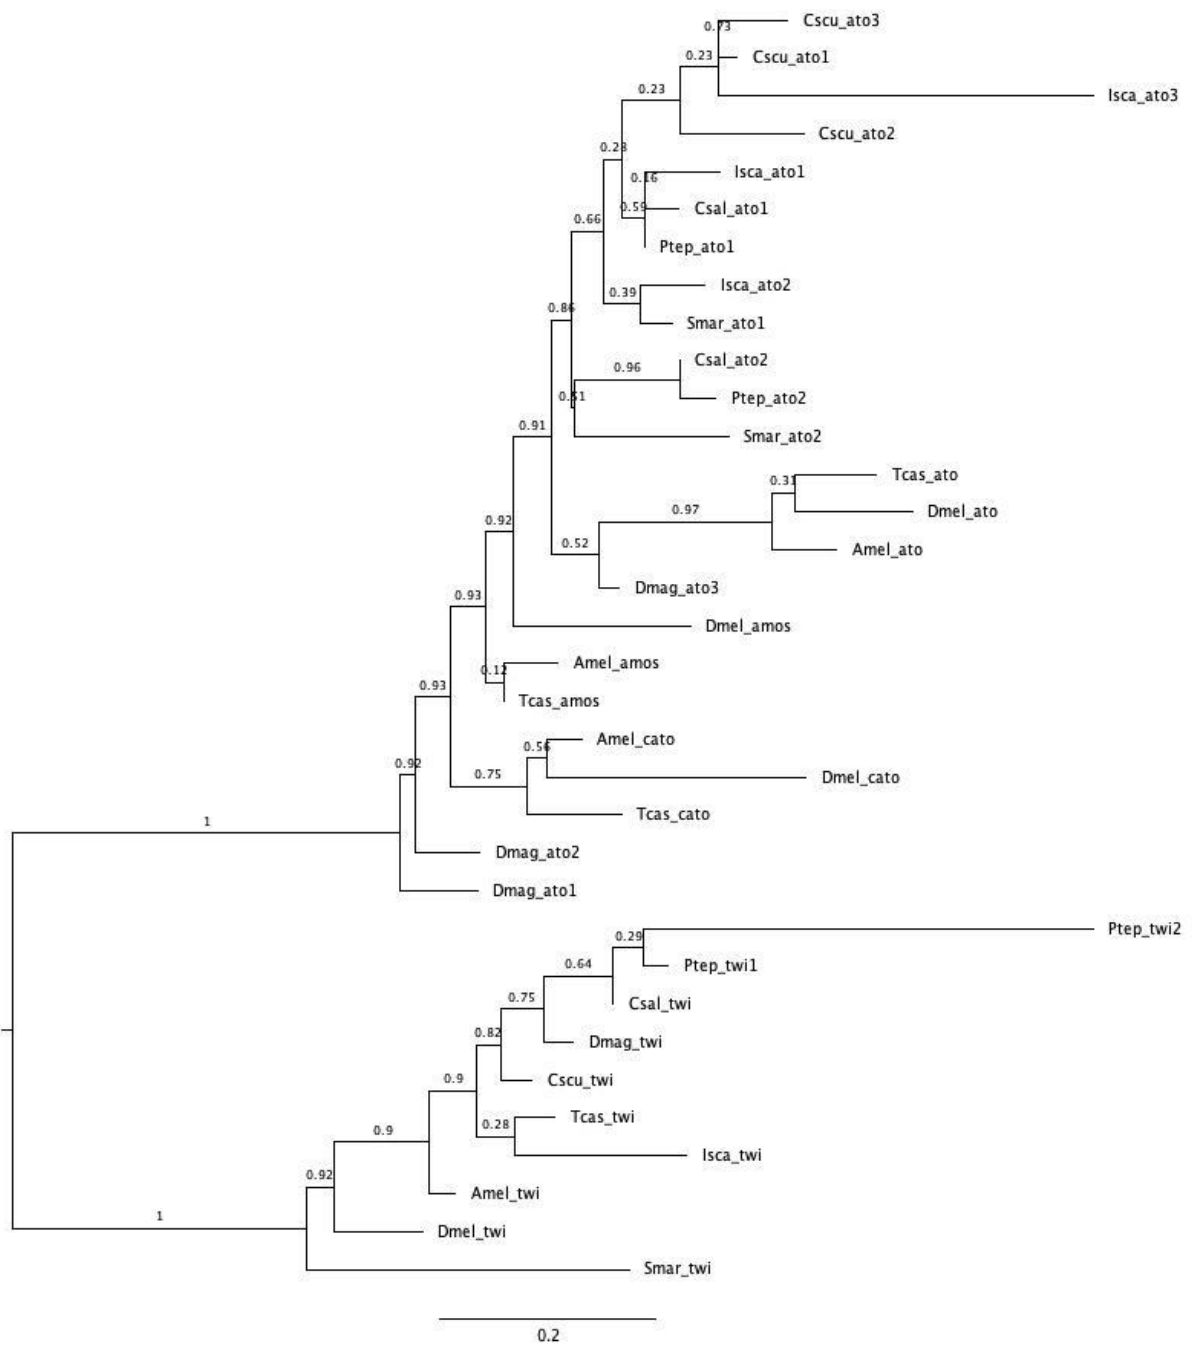

**Figure S3.** Maximum likelihood phylogeny of arthropod *ato* and *twist* genes, including orthologs identified in *Parasteatoda tepidariorum*. Two copies of *ato* and two potential copies of *twist* were recovered from *P. tepidariorum*.
