# Supplementary material for: Regulation of Eye Determination and Regionalization in the Spider Parasteatoda tepidariorum
Source: Cells. 2022 Feb 11;11(4):631. doi: 10.3390/cells11040631 (PMC8870698; doi:10.3390/cells11040631)
Supplement: Supplementary file 1 [file cells-11-00631-s001.zip › Supplementary Table S1.xlsx]

## Sheet: Sheet1
Table S1. List of primers used to synthesis ISH probes.
Gene Name	Forward primer	Reverse primer	Fragment size
Pt-so1	CAGGATAGAGACTGGGAGCG	TTTCCTACTGCCCCAAGAGG	557 bp
Pt-Pax6.1	GCTGCATCGTCTCTGTTCAG	GGTGTTGATGCCTCCGTTAC	742 bp
Pt-Pax6.2	GGCGAACCGTAGATCAAGTG	CTGTGGTCTAAGGCAGGTGT	589 bp
Pt-eyg	TACATCACCAGTCACCCCAC	TCTACGAAACTTGGGCCGAT	868 bp
Pt-ato1	ACGTGCTTTTGATGCGGAAA	TCATAACAGCAGGCGAAGGA	862 bp
Pt-ato2	TGCATTCAAGTATCATTGCTCAG	GCTGTGATATAAGTTTGGGCCA	629 bp
Pt-hh	GTGCCTGGCCGCATTAGTG	TGAGTCACCATCGAAACATC	577 bp
Pt-dpp	GTGTTTGATCTCCTGCGACC	CAACAAGCTCTGGGTACTGC	526 bp
Pt-Wnt2	TTGATGGCGTTCTGTTGTCC	CCCAGAGTACCCAACGACTT	836 bp
Pt-Wnt5	TGACACCTGTTGAGCGAAAC	ATCCTGTCTCTTCGTTGGGG	1028 bp
Pt-Wnt7.2	CCCTGAAGGTGGATGGAAGT	TGGATGAATGGTGCGAGTCA	663 bp
Pt-Wnt8	TGTCCGGTTCAAAAGCTGTG	AACTTGCTCTCTCTGCGTCT	795 bp
Pt-Wnt16	AAAGGGATGTGAGGGCTCTT	TTGTCGCCAGGTTTGTTTGA	654 bp
